# Supplementary material for: Glecaprevir–pibrentasvir for chronic hepatitis C: Comparing treatment effect in patients with and without end-stage renal disease in a real-world setting
Source: PubMed Central journal article supplement (PMC7425913; doi:10.1371/journal.pone.0237582), 2020-08-13
Supplement: pone.0237582.s001.pdf [file pone.0237582.s001.pdf]

| Side-Effect-GOT | Side-Effect-GP] | Side-Effect-Bil(T) | Side-Effect-Anem | Anorexia | Dizziness |
|-----------------|-----------------|--------------------|------------------|----------|-----------|
| 0               | 0               | 0                  | G0               |          |           |
| 0               | 0               | 0                  | G0               |          |           |
| 0               | 0               | 0                  | G0               |          |           |
| 0               | 0               | 0                  | G1               |          |           |
| 0               | 0               | 0                  | G2               |          |           |
| 0               | 0               | 0                  | G0               |          |           |
| 0               | 0               | 0                  | G0               |          |           |
| 0               | 0               | 0                  | G1               |          |           |
| 0               | 0               | 0                  | G1               |          |           |
| 0               | 0               | 0                  | G0               |          |           |
| 0               | 0               | 0                  | G1               |          |           |
| 0               | 0               | 0                  | G1               |          |           |
| 0               | 0               | 0                  | G0               |          |           |
| 0               | 0               | 0                  | G1               |          |           |
| 0               | 0               | 0                  | G0               |          |           |
| 0               | 0               | 0                  | G0               |          |           |
| 0               | 0               | 4.24               | G0               |          |           |
| 0               | 0               | 0                  | G0               |          |           |
| 0               | 0               | 0                  | G2               |          |           |
| 0               | 0               | 1.4                | G0               |          |           |
| 0               | 0               | 0                  | G0               |          |           |
| 0               | 0               | 0                  | G0               |          |           |
| 0               | 0               | 0                  | G2               |          |           |
| 0               | 0               | 0                  | G0               |          |           |
| 0               | 0               | 0                  | G0               |          |           |
| 0               | 0               | 1.78               | G0               |          |           |
| 0               | 0               | 0                  | G0               |          |           |
| 0               | 0               | 0                  | G2               |          |           |
| 0               | 0               | 0                  | G0               |          |           |
| 0               | 0               | 0                  | G1               |          |           |
| 0               | 0               | 0                  | G0               |          |           |
| 0               | 0               | 0                  | G0               |          |           |
| 0               | 0               | 1.5                | G0               |          |           |
| 0               | 0               | 0                  | G1               |          |           |
| 0               | 0               | 0                  | G0               |          |           |
| 0               | 0               | 0                  | G0               |          |           |
| 0               | 0               | 1.61               | G0               |          |           |
| 0               | 0               | 2                  | G2               |          |           |
| 0               | 0               | 0                  | G2               |          |           |
| 0               | 0               | 1.7                | G3               |          |           |
| 0               | 0               | 0                  | G2               |          |           |
| 0               | 0               | 4.7                | G2               |          |           |
| 0               | 0               | 0                  | G0               |          |           |
| 0               | 0               | 1.6                | G0               |          |           |
| 0               | 0               | 0                  | G0               |          |           |
| 0               | 0               | 0                  | G1               |          |           |
| 0               | 0               | 0                  | G1               |          |           |
| 0               | 0               | 0                  | G0               |          |           |
| 0               | 0               | 0                  | G0               |          |           |

|       |       |         |
|-------|-------|---------|
| 0     | 0     | 0 G1    |
| 0     | 0     | 0 G0    |
| 0     | 0     | 0 G0    |
| 0     | 0     | 2 G0    |
| 0     | 0     | 0 G0    |
| 0     | 0     | 1.9 G2  |
| 0     | 0     | 0 G0    |
| 1.5   | 0     | 0 G0    |
| 0     | 0     | 0 G2    |
| 0     | 0     | 1.3 G0  |
| 0     | 0     | 0 G0    |
| 0     | 0     | 0 G1    |
| 0     | 0     | 1.47 G0 |
| 0     | 0     | 0 G2    |
| 0     | 0     | 0 G0    |
| 0     | 0     | 1.95 G0 |
| 0     | 0     | 0 G0    |
| 0     | 0     | 1.79 G1 |
| 0     | 0     | 0 G0    |
| 0     | 0     | 0 G0    |
| 0     | 0     | 0 G0    |
| 1.2   | 1.175 | 1.6 G0  |
| 0     | 0     | 0 G0    |
| 0     | 0     | 0 G1    |
| 0     | 0     | 0 G0    |
| 0     | 0     | 0 G0    |
| 0     | 0     | 0 G0    |
| 0     | 0     | 0 G1    |
| 0     | 0     | 0 G0    |
| 0     | 0     | 0 G0    |
| 0     | 0     | 0 G0    |
| 0     | 1.25  | 1.46 G0 |
| 0     | 0     | 0 G0    |
| 0     | 0     | 1.79 G0 |
| 0     | 0     | 1.33 G0 |
| 0     | 0     | 0 G1    |
| 0     | 0     | 0 G0    |
| 0     | 0     | 0 G1    |
| 0     | 0     | 0 G0    |
| 0     | 0     | 1.2 G0  |
| 1.125 | 1.25  | 0 G0    |
| 0     | 0     | 0 G0    |
| 0     | 0     | 1.7 G0  |
| 0     | 0     | 0 G0    |
| 0     | 0     | 2.23 G2 |
| 0     | 0     | 0 G0    |
| 0     | 0     | 2.93 G0 |
| 0     | 0     | 0 G3    |
| 1.95  | 1.7   | 0 G0    |

|      |      |         |   |   |
|------|------|---------|---|---|
| 0    | 0    | 0 G0    |   |   |
| 0    | 0    | 0 G0    |   |   |
| 0    | 0    | 0 G1    |   |   |
| 0    | 0    | 0 G0    |   |   |
| 0    | 0    | 1.6 G0  |   |   |
| 0    | 0    | 0 G0    |   |   |
| 0    | 0    | 0 G2    |   |   |
| 0    | 0    | 1.67 G0 |   |   |
| 0    | 0    | 2.76 G1 |   | 1 |
| 0    | 0    | 1.29 G0 |   |   |
| 0    | 0    | 2 G0    |   | 1 |
| 0    | 0    | 0 G0    |   | 1 |
| 0    | 0    | 0 G1    |   |   |
| 0    | 0    | 0 G2    |   |   |
| 0    | 0    | 0 G1    |   |   |
| 0    | 0    | 0 G0    |   |   |
| 0    | 0    | 0 G0    |   |   |
| 0    | 0    | 0 G0    |   |   |
| 0    | 0    | 0 G0    |   |   |
| 0    | 0    | 0 G0    |   |   |
| 0    | 0    | 0 G0    |   |   |
| 0    | 0    | 0 G0    |   |   |
| 0    | 0    | 0 G0    |   |   |
| 0    | 0    | 0 G0    |   |   |
| 0    | 0    | 0 G0    |   |   |
| 0    | 0    | 0 G0    |   |   |
| 0    | 0    | 0 G0    |   |   |
| 0    | 0    | 0 G0    |   |   |
| 0    | 0    | 0 G0    |   |   |
| 0    | 0    | 0 G0    |   |   |
| 0    | 0    | 0 G0    |   |   |
| 0    | 0    | 0 G2    |   |   |
| 0    | 0    | 0 G1    |   |   |
| 0    | 0    | 0 G2    |   |   |
| 0    | 0    | 0 G0    |   |   |
| 0    | 0    | 0 G0    |   |   |
| 1.7  | 1.65 | 2.04 G0 |   |   |
| 0    | 0    | 0 G0    |   |   |
| 0    | 0    | 0 G0    |   |   |
| 0    | 0    | 0 G1    |   |   |
| 1.2  | 1.8  | 0 G2    |   |   |
| 0    | 0    | 0 G0    |   |   |
| 0    | 0    | 0 G1    |   |   |
| 0    | 0    | 0 G0    |   |   |
| 0    | 0    | 0 G0    |   |   |
| 0    | 0    | 0 G0    | 1 | 1 |
| 0    | 0    | 0 G0    |   |   |
| 0    | 0    | 0 G0    |   |   |
| 0    | 0    | 0 G0    |   | 1 |
| 0    | 0    | 0 G0    |   |   |
| 5.35 | 4.35 | 0 G0    |   |   |
| 0    | 0    | 0 G1    |   |   |
| 0    | 0    | 0 G0    |   |   |
| 0    | 0    | 1.6 G3  |   |   |

|       |       |         |
|-------|-------|---------|
| 0     | 0     | 0 G0    |
| 0     | 0     | 0 G0    |
| 0     | 0     | 0 G0    |
| 0     | 0     | 0 G0    |
| 0     | 0     | 0 G0    |
| 0     | 0     | 0 G0    |
| 0     | 0     | 1.9 G0  |
| 0     | 0     | 0 G0    |
| 0     | 0     | 0 G0    |
| 0     | 0     | 0 G0    |
| 0     | 0     | 0 G0    |
| 0     | 0     | 1.8 G0  |
| 0     | 0     | 0 G2    |
| 0     | 0     | 0 G0    |
| 0     | 0     | 0 G0    |
| 0     | 0     | 0 G0    |
| 0     | 0     | 0 G1    |
| 0     | 0     | 0 G0    |
| 0     | 0     | 0 G0    |
| 0     | 0     | 0 G2    |
| 0     | 0     | 0 G0    |
| 1.675 | 1.85  | 0 G2    |
| 1.55  | 0     | 1.4 G0  |
| 0     | 0     | 1.9 G0  |
| 0     | 0     | 0 G1    |
| 0     | 0     | 0 G2    |
| 0     | 0     | 0 G0    |
| 0     | 0     | 0 G0    |
| 0     | 0     | 0 G0    |
| 0     | 0     | 0 G0    |
| 0     | 0     | 0 G0    |
| 0     | 0     | 0 G0    |
| 0     | 0     | 0 G0    |
| 0     | 0     | 0 G1    |
| 0     | 0     | 0 G0    |
| 0     | 0     | 2.2 G0  |
| 0     | 0     | 0 G0    |
| 0.925 | 1.775 | 0 G0    |
| 0     | 0     | 0 G0    |
| 0     | 0     | 1.38 G0 |
| 0     | 0     | 2.65 G1 |
| 3.575 | 6.4   | 0 G0    |
| 0     | 0     | 0 G0    |
| 0     | 0     | 0 G1    |
| 0     | 0     | 2.3 G0  |
| 0     | 0     | 3.4 G1  |
| 0     | 0     | 0 G3    |
| 0     | 0     | 0 G0    |
| 0     | 0     | 0 G2    |
| 0     | 0     | 0 G0    |
| 3.65  | 4.475 | 2.11 G0 |

|       |       |         |
|-------|-------|---------|
| 0     | 0     | 0 G0    |
| 0     | 0     | 0 G0    |
| 0     | 0     | 1.48 G0 |
| 0     | 0     | 0 G0    |
| 0     | 0     | 0 G0    |
| 2.95  | 7.475 | 0 G0    |
| 1.85  | 1.85  | 2.71 G0 |
| 0     | 0     | 0 G0    |
| 0     | 0     | 1.38 G0 |
| 0     | 0     | 0 G0    |
| 1.05  | 1.125 | 0 G0    |
| 0     | 0     | 0 G0    |
| 0     | 0     | 0 G0    |
| 1.275 | 1.15  | 0 G0    |
| 0     | 0     | 0 G1    |
| 0     | 0     | 0 G0    |
| 0     | 0     | 0 G0    |
| 0     | 0     | 0 G0    |
| 0     | 0     | 1.37 G0 |
| 0     | 0     | 0 G0    |
| 0     | 0     | 0 G1    |
| 0     | 0     | 0 G0    |
| 0     | 0     | 0 G1    |
| 0     | 0     | 0 G0    |
| 1     | 1.425 | 0 G0    |
| 0     | 0     | 0 G0    |
| 0.975 | 1.375 | 0 G0    |
| 0     | 0     | 0 G0    |
| 0     | 0     | 0 G0    |
| 0     | 0     | 0 G0    |
| 0     | 0     | 2.67 G1 |
| 0     | 0     | 0 G0    |
| 0     | 0     | 0 G0    |
| 0     | 0     | 0 G0    |
| 0     | 0     | 1.4 G0  |
| 0     | 0     | 0 G0    |

| Malaise | GERD | Insomnia | sex | age | BMI      | CR   | Genotype | INR  | BIL  |
|---------|------|----------|-----|-----|----------|------|----------|------|------|
|         |      |          | F   | 72  | 20.44    | 0.68 | 2        | 0.94 | 0.5  |
|         | 1    |          | F   | 72  | 25.11    | 0.79 | 2        | 0.89 | 0.63 |
|         |      |          | F   | 56  | 26.78    | 1.04 | 2        | 0.85 | 0.69 |
|         |      | 1        | M   | 56  | 25.16    | 0.8  | 1a       | 0.96 | 0.47 |
|         |      |          | F   | 76  | 23.19    | 2.74 | 1b       | 0.88 | 0.28 |
|         |      |          | F   | 53  | 19.65    | 0.51 | 1b       | 0.82 | 0.6  |
|         | 1    |          | F   | 66  | 23.21    | 0.6  | 1b       | 0.96 | 0.69 |
|         |      |          | F   | 78  | 17.65    | 1    | 1b       | 1.3  | 1.27 |
|         |      |          | M   | 55  | 21.48    | 6.27 | 2        | 1    | 0.83 |
|         |      |          | F   | 54  | 20.5     | 0.63 | 1b       | 0.91 | 0.75 |
|         |      |          | M   | 56  | 32.45    | 9.39 | 1b       | 0.79 | 0.51 |
|         |      |          | F   | 72  | 23.23    | 2.15 | 1b       | 0.85 | 0.64 |
|         |      |          | F   | 70  | 27.23    | 0.68 | 2        | 0.93 | 0.46 |
|         |      |          | F   | 72  | 20.89    | 0.8  | 2        | 0.99 | 0.6  |
|         |      |          | F   | 74  | 22.32    | 0.75 | 2        | 1.06 | 0.7  |
|         |      |          | F   | 58  | 22.4     | 0.64 | 1b       | 0.9  | 0.9  |
|         |      |          | F   | 78  | 23.96    | 0.6  | 2        | 1.14 | 1.59 |
|         |      |          | M   | 48  | 25.34    | 1.2  | 1a       | 0.98 | 1.03 |
|         | 1    |          | F   | 80  | 22.6     | 1.77 | 1b       | 0.95 | 0.54 |
|         |      |          | M   | 43  | 19.15    | 0.8  | 2        | 0.96 | 0.77 |
|         |      |          | F   | 64  | 28.16    | 0.65 | 1b       | 0.93 | 0.64 |
|         |      |          | M   | 72  | 28.73    | 1.42 | 2        | 0.88 | 0.73 |
|         |      |          | F   | 69  | 26.58    | 6.09 | 2        | 0.94 | 0.34 |
|         |      | 1        | F   | 64  | 23.56    | 0.58 | 1b       | 0.94 | 1.23 |
|         |      |          | F   | 79  | 23.23    | 0.78 | 6        | 1    | 0.55 |
|         |      |          | M   | 67  | 20.31    | 0.29 | 1b       | 0.95 | 1.7  |
|         |      |          | M   | 69  | 23.09    | 1.03 | 1b       | 1.02 | 0.78 |
|         |      |          | F   | 83  | 27.19    | 8.38 | 2a       | 0.95 | 0.61 |
|         |      |          | M   | 60  | 26.61    | 1.34 | 1b       | 0.89 | 1.21 |
|         |      |          | F   | 78  | 20.7     | 8.6  | 1b       | 0.87 | 0.59 |
|         |      |          | F   | 53  | 20.93    | 0.68 | 2        | 0.95 | 0.94 |
|         |      |          | M   | 74  | 20.69    | 1.01 | 2        | 0.96 | 0.52 |
|         |      |          | M   | 59  | 26.03    | 1.1  | 1b       | 0.91 | 0.9  |
|         | 1    |          | M   | 69  | 26.02    | 3.19 | 1b       | 0.91 | 0.89 |
|         |      |          | M   | 67  | 26.82    | 0.6  | 2        | 0.89 | 0.4  |
|         |      |          | F   | 61  | 22.55    | 0.86 | 2        | 0.89 | 0.73 |
|         |      |          | F   | 73  | 21.04    | 0.85 | 2        | 0.96 | 0.69 |
|         |      |          | F   | 46  | 20       | 0.4  | 2        | 0.97 | 1.6  |
|         |      |          | F   | 80  | 25.78    | 8.43 | 1a       | 0.95 | 0.44 |
|         |      |          | F   | 74  | 21.76    | 0.8  | 2        | 1.11 | 0.73 |
|         |      |          | F   | 81  | 22.67    | 4.37 | 1b       | 1.02 | 0.47 |
|         |      | 1        | M   | 61  | 24.22    | 7.49 | 1b       | 1.01 | 0.84 |
|         |      |          | M   | 62  | 25.56    | 1.15 | 2        | 0.93 | 0.7  |
|         |      |          | F   | 62  | 26.13    | 0.74 | 2        | 0.97 | 1.34 |
|         |      |          | F   | 62  | 28.72    | 0.95 | 1b       | 0.94 | 0.46 |
|         |      |          | F   | 55  | 21.9     | 0.58 | 2        | 0.91 | 0.34 |
|         | 1    |          | F   | 77  | 19.98    | 1.09 | 2        | 0.77 | 0.31 |
|         |      |          | M   | 49  | 21.26    | 1.17 | 1b       | 0.79 | 0.5  |
|         |      |          | F   | 85  | 20.13333 | 5.4  | 6        | 10.6 | 0.4  |

|   |     |    |       |       |      |      |      |
|---|-----|----|-------|-------|------|------|------|
|   | M   | 69 | 20.52 | 10.36 | 2    | 1    | 0.6  |
|   | F   | 58 | 23.15 | 0.58  | 1b   | 0.87 | 0.56 |
|   | F   | 63 | 17.72 | 0.59  | 1b   | 0.99 | 1.54 |
|   | M   | 50 | 17.71 | 0.82  | 3    | 0.93 | 0.9  |
|   | M   | 75 | 25.08 | 3.54  | 2    | 0.87 | 0.27 |
|   | F   | 84 | 17.59 | 2.47  | 2b   | 1    | 0.8  |
|   | F   | 51 | 18.59 | 0.63  | 1b   | 0.96 | 0.6  |
|   | M   | 50 | 24.02 | 0.67  | 6    | 0.91 | 0.36 |
|   | F   | 79 | 25.33 | 7.68  | 1b   | 0.83 | 0.57 |
|   | M   | 50 | 23.36 | 0.92  | 3    | 0.98 | 1.07 |
|   | 1 M | 60 | 24.41 | 13.02 | 1b   | 0.89 | 0.62 |
|   | M   | 85 | 22.03 | 7.2   | 1b   | 0.91 | 0.69 |
|   | M   | 82 | 25.4  | 1.26  | 1b   | 0.94 | 0.43 |
|   | F   | 60 | 33.12 | 12.13 | 1b   | 1.07 | 0.55 |
|   | M   | 49 | 21.77 | 0.73  | 3    | 0.94 | 0.42 |
|   | M   | 24 | 27.3  | 0.82  | 2    | 0.9  | 1.12 |
|   | M   | 43 | 23.03 | 0.95  | 2b   | 1.02 | 0.67 |
|   | F   | 81 | 21.91 | 6.44  | 1b   | 0.9  | 0.66 |
|   | F   | 48 | 20.4  | 0.63  | 1b   | 0.99 | 0.47 |
|   | F   | 66 | 25.72 | 0.63  | 1b   | 0.91 | 0.54 |
|   | M   | 46 | 23.85 | 0.83  | 2    | 0.86 | 0.9  |
|   | 1 F | 63 | 26.5  | 0.63  | 1b   | 1.02 | 0.71 |
|   | F   | 64 | 26.67 | 0.79  | 2    | 0.89 | 0.4  |
|   | F   | 63 | 27.73 | 1.24  | 1b   | 1.12 | 0.46 |
|   | M   | 36 | 26.4  | 0.82  | 3    | 0.82 | 1.09 |
|   | F   | 59 | 23.32 | 0.75  | 1b   | 1.23 | 1.03 |
|   | F   | 44 | 23.53 | 0.72  | 1b   | 0.87 | 0.41 |
|   | F   | 60 | 21.41 | 11.6  | 2    | 0.87 | 0.34 |
|   | M   | 85 | 23.9  | 2.02  | 1b   | 1    | 0.65 |
|   | F   | 56 | 21.94 | 0.57  | 2    | 0.96 | 0.7  |
| 1 | F   | 44 | 17.63 | 0.58  | 1b   | 0.93 | 0.78 |
|   | F   | 57 | 21.6  | 0.65  | 2    | 0.85 | 0.61 |
|   | 1 M | 43 | 29.31 | 0.75  | 1b   | 1    | 1.2  |
|   | F   | 78 | 24.03 | 0.65  | 2    | 0.92 | 0.81 |
|   | F   | 56 | 25.97 | 0.38  | 1b   | 0.91 | 0.74 |
|   | M   | 60 | 22.76 | 0.99  | 1b   | 0.96 | 1.02 |
|   | M   | 60 | 20.52 | 7.5   | 2    | 0.89 | 0.8  |
|   | F   | 68 | 22.19 | 0.57  | 2    | 0.99 | 0.5  |
|   | M   | 65 | 30.86 | 7.05  | 2    | 0.9  | 0.61 |
| 1 | 1 M | 54 | 19.71 | 1.02  | 1b+2 | 0.86 | 0.92 |
|   | F   | 74 | 19.31 | 0.63  | 6    | 0.89 | 0.92 |
|   | M   | 65 | 23.8  | 0.42  | 2    | 0.98 | 0.55 |
| 1 | F   | 60 | 20    | 0.48  | 2    | 1.04 | 0.37 |
|   | F   | 73 | 23.81 | 0.73  | 2    | 0.9  | 1.04 |
|   | F   | 81 | 23.5  | 0.65  | 1b   | 0.95 | 0.6  |
|   | M   | 82 | 21.23 | 7.63  | 1b   | 0.9  | 0.46 |
|   | F   | 35 | 21.09 | 0.76  | 3    | 1    | 1.03 |
|   | F   | 63 | 26.02 | 0.48  | 2a   | 1.04 | 1.86 |
|   | 1 F | 67 | 23.37 | 9.56  | 1b   | 0.83 | 0.43 |
|   | M   | 47 | 26.22 | 0.77  | 3    | 1.15 | 0.94 |

|   |     |    |       |           |      |      |
|---|-----|----|-------|-----------|------|------|
|   | F   | 65 | 20.08 | 0.61 1or6 | 0.85 | 0.87 |
|   | 1 M | 52 | 24.26 | 11.91 1a  | 0.89 | 0.45 |
|   | M   | 60 | 22.45 | 7.49 1a   | 0.87 | 0.65 |
|   | F   | 68 | 22.22 | 0.73 4    | 0.98 | 0.36 |
|   | 1 F | 53 | 18.18 | 6.34 2    | 0.76 | 0.47 |
|   | 1 F | 62 | 19.65 | 0.63 1b   | 0.81 | 0.59 |
|   | M   | 86 | 18.12 | 8.75 1b   | 0.89 | 0.62 |
|   | F   | 67 | 20    | 1.24 1b   | 1.01 | 0.81 |
|   | 1 F | 72 | 26.01 | 6.83 1b   | 0.91 | 0.5  |
|   | F   | 76 | 22.81 | 0.58 2    | 1.87 | 0.66 |
|   | M   | 57 | 22.41 | 0.87 1b   | 0.99 | 1.11 |
|   | 1 F | 45 | 28.19 | 0.6 6     | 1.04 | 1.11 |
|   | M   | 43 | 23.89 | 1.06 3    | 0.89 | 0.79 |
|   | F   | 79 | 22.97 | 7.56 2    | 0.85 | 0.39 |
|   | M   | 54 | 26.98 | 0.99 2    | 0.99 | 1.77 |
|   | F   | 44 | 17.91 | 0.64 2    | 0.96 | 0.4  |
|   | M   | 68 | 22.77 | 0.9 2     | 1.03 | 0.7  |
| 1 | M   | 57 | 22.66 | 0.93 1b   | 0.95 | 0.5  |
|   | M   | 43 | 20.42 | 1.01 3    | 1.03 | 1.21 |
|   | F   | 63 | 25.48 | 0.52 1b   | 0.95 | 0.88 |
|   | F   | 61 | 21.5  | 0.78 1b   | 0.89 | 0.76 |
|   | F   | 56 | 26.29 | 0.76 2    | 0.84 | 0.65 |
|   | M   | 43 | 24.38 | 0.92 1b   | 0.94 | 0.46 |
|   | F   | 72 | 28.93 | 1.74 2    | 0.94 | 0.66 |
|   | M   | 58 | 26.02 | 1.2 2     | 0.89 | 0.41 |
|   | F   | 58 | 25.74 | 1.06 2    | 1.02 | 0.6  |
|   | F   | 61 | 23.51 | 0.62 1a   | 1.06 | 0.65 |
|   | F   | 66 | 19.14 | 0.6 2     | 0.98 | 0.94 |
|   | M   | 85 | 21.92 | 3.47 1b   | 0.9  | 0.71 |
|   | M   | 53 | 24.61 | 0.1 2     | 0.9  | 0.72 |
|   | M   | 66 | 24.22 | 7.82 2    | 1    | 0.52 |
|   | M   | 35 | 19.53 | 0.87 2    | 1    | 0.43 |
|   | F   | 62 | 23.34 | 0.52 2    | 0.84 | 0.79 |
|   | M   | 39 | 22.04 | 1.06 3    | 0.9  | 1.16 |
|   | F   | 49 | 34.17 | 0.76 2    | 0.88 | 0.78 |
|   | M   | 84 | 21.42 | 1.17 2    | 0.85 | 0.45 |
|   | F   | 68 | 29.33 | 8.6 2     | 0.95 | 0.57 |
|   | M   | 38 | 30.49 | 8.9 3     | 0.97 | 0.81 |
|   | M   | 49 | 24.68 | 0.89 3    | 0.94 | 0.86 |
|   | M   | 90 | 19.72 | 10.1 1    | 0.97 | 0.46 |
|   | M   | 53 | 25.61 | 0.93 6    | 0.93 | 0.8  |
|   | M   | 53 | 26.35 | 0.79 1a   | 0.87 | 1.22 |
|   | F   | 42 | 21.3  | 0.93 3    | 0.9  | 0.19 |
|   | M   | 56 | 23.14 | 0.73 1    | 0.91 | 0.56 |
|   | M   | 59 | 25.91 | 0.83 1b   | 1.04 | 0.38 |
|   | F   | 43 | 19.31 | 0.45 2    | 0.96 | 0.53 |
|   | F   | 68 | 18.49 | 5.5 1b    | 0.89 | 0.91 |
|   | M   | 71 | 30.12 | 10.43 2   | 0.94 | 0.34 |
| 1 | M   | 49 | 19.58 | 0.66 1b   | 1.04 | 0.52 |
|   | F   | 44 | 21.43 | 0.74 3    | 0.91 | 0.52 |



|   |     |    |       |       |      |      |      |
|---|-----|----|-------|-------|------|------|------|
|   | M   | 63 | 24.35 | 0.78  | 2    | 0.82 | 0.7  |
| 1 | 1 F | 51 | 25.37 | 0.48  | 1b   | 1    | 0.69 |
|   | M   | 59 | 27.4  | 1.27  | 2    | 1.05 | 1.25 |
|   | F   | 65 | 23.23 | 0.5   | 2    | 0.97 | 0.78 |
| 1 | M   | 51 | 24.17 | 10.72 | 2    | 0.88 | 0.4  |
|   | F   | 52 | 28.62 | 0.7   | 2    | 1.07 | 1.44 |
|   | M   | 63 | 23.63 | 0.94  | 1b   | 1.02 | 2.01 |
|   | F   | 63 | 23.14 | 0.62  | 2    | 0.88 | 0.73 |
|   | F   | 68 | 20.4  | 0.61  | 1b   | 0.91 | 0.36 |
|   | M   | 48 | 24.34 | 1.09  | 6    | 0.98 | 1.01 |
|   | F   | 46 | 19.92 | 0.63  | 2    | 0.94 | 0.95 |
|   | M   | 62 | 24.85 | 0.64  | 1b   | 0.95 | 1.1  |
|   | M   | 53 | 24.1  | 2.9   | 1b   | 0.91 | 0.49 |
|   | M   | 39 | 25.45 | 0.9   | 6    | 0.89 | 0.5  |
|   | 1 F | 61 | 25.74 | 0.81  | 2    | 0.86 | 0.81 |
|   | F   | 52 | 22.85 | 0.65  | 1b   | 0.91 | 0.95 |
|   | M   | 71 | 19.53 | 12.52 | 1b   | 0.91 | 0.35 |
|   | M   | 60 | 25.43 | 0.83  | 1b   | 0.99 | 0.9  |
|   | F   | 60 | 22.65 | 7.38  | 2    | 0.85 | 0.35 |
|   | F   | 76 | 25.24 | 2.27  | 2    | 0.89 | 0.46 |
|   | M   | 60 | 25.54 | 7.13  | 2    | 0.9  | 0.79 |
|   | M   | 71 | 20.7  | 10.77 | 1b   | 0.96 | 0.44 |
|   | M   | 58 | 24.89 | 1.18  | 6    | 0.91 | 1.32 |
|   | M   | 68 | 23.07 | 0.92  | 2    | 0.9  | 0.85 |
|   | F   | 41 | 18.14 | 0.64  | 3    | 0.88 | 0.67 |
|   | F   | 64 | 30.86 | 1.46  | 1b   | 0.89 | 0.2  |
|   | M   | 44 | 32.11 | 1.1   | 3    | 0.92 | 0.67 |
|   | M   | 64 | 29.41 | 0.75  | 1b   | 0.97 | 1.06 |
|   | F   | 53 | 27.21 | 0.62  | 2    | 0.97 | 0.47 |
|   | F   | 72 | 27.7  | 0.8   | 2    | 0.89 | 0.53 |
|   | F   | 44 | 20.2  | 0.7   | 1b   | 0.85 | 0.32 |
|   | M   | 37 | 27.04 | 0.61  | 2    | 0.88 | 0.34 |
|   | M   | 59 | 28.73 | 10.72 | 2    | 1.07 | 1.38 |
|   | F   | 60 | 29.3  | 0.64  | 1b   | 0.9  | 0.64 |
|   | M   | 42 | 28.41 | 1.41  | 2    | 0.94 | 0.7  |
|   | M   | 65 | 26.41 | 7.51  | 2    | 0.92 | 0.79 |
|   | M   | 40 | 34.31 | 1.09  | 2    | 0.96 | 1.18 |
|   | M   | 44 | 27.48 | 0.97  | 3    | 0.98 | 0.69 |
|   | F   | 61 | 18.13 | 0.7   | 1b   | 1    | 0.89 |
|   | 1 M | 58 | 34.77 | 1.24  | 1a   | 0.95 | 0.73 |
|   | 1 M | 61 | 24.22 | 0.78  | 1b+2 | 0.89 | 0.59 |
|   | F   | 53 | 19.42 | 0.67  | 1b   | 0.96 | 0.68 |
|   | 1 M | 41 | 25.45 | 14.92 | 6    | 0.98 | 0.41 |
|   | M   | 50 | 23.03 | 1.05  | 2    | 0.82 | 0.53 |
|   | M   | 60 | 17.4  | 1.01  | 2    | 1.01 | 0.66 |
|   | F   | 54 | 23.07 | 5.96  | 2    | 0.95 | 0.44 |
|   | F   | 50 | 21.7  | 0.79  | 2    | 1.12 | 1.1  |
|   | F   | 47 | 22.7  | 0.57  | 1b   | 1.03 | 0.82 |
|   | F   | 55 | 25.15 | 0.67  | 2    | 0.97 | 0.7  |
|   | M   | 53 | 31.24 | 1.18  | 3    | 1.06 | 0.71 |

|   |   |    |       |           |      |      |
|---|---|----|-------|-----------|------|------|
|   | F | 60 | 23.28 | 6.5 1b    | 0.95 | 0.78 |
|   | M | 40 | 20.58 | 0.73 1b   | 0.92 | 0.67 |
|   | M | 75 | 21.3  | 1.14 1b   | 0.98 | 0.7  |
|   | M | 43 | 26.35 | 0.86 6    | 0.92 | 0.39 |
| 1 | F | 60 | 25.88 | 0.81 1b   | 1.04 | 0.54 |
|   | M | 54 | 28.14 | 1.06 1b   | 0.99 | 0.8  |
|   | M | 66 | 23.63 | 5.97 2    | 0.95 | 0.47 |
|   | F | 68 | 22.72 | 0.51 2    | 1.05 | 1.07 |
|   | F | 63 | 20.7  | 0.71 2b   | 0.94 | 0.41 |
|   | F | 71 | 28.51 | 0.63 2    | 1.09 | 0.42 |
|   | M | 74 | 22.94 | 1.07 1b   | 0.89 | 0.38 |
| 1 | F | 72 | 21.93 | 0.92 1b   | 0.97 | 1.69 |
|   | F | 65 | 20.2  | 0.67 2    | 0.97 | 1.29 |
|   | M | 49 | 25.46 | 0.75 1a   | 0.94 | 0.56 |
|   | M | 66 | 18.49 | 3.97 1b   | 0.89 | 0.26 |
|   | F | 55 | 30.06 | 0.55 2    | 0.87 | 0.63 |
|   | F | 50 | 19.45 | 0.43 1b   | 1.03 | 0.96 |
| 1 | F | 68 | 26.55 | 0.59 2    | 1.01 | 0.48 |
|   | M | 45 | 24.8  | 0.88 6    | 0.94 | 0.31 |
|   | F | 63 | 21.02 | 0.77 1b   | 0.95 | 0.29 |
|   | M | 85 | 19.42 | 9.04 1b   | 0.97 | 0.7  |
|   | F | 56 | 26.22 | 0.66 1b   | 0.92 | 0.88 |
|   | M | 67 | 34.5  | 9.31 1b   | 1.33 | 0.93 |
|   | F | 51 | 20.7  | 0.62 2    | 0.83 | 0.6  |
|   | M | 43 | 22.24 | 0.83 1b   | 0.85 | 0.73 |
|   | F | 63 | 22.4  | 0.44 2    | 0.87 | 0.39 |
|   | F | 61 | 21.36 | 0.59 1b   | 0.91 | 0.99 |
|   | M | 29 | 26.36 | 0.78 2    | 0.91 | 0.71 |
|   | F | 76 | 21.61 | 0.9 1b    | 0.83 | 0.85 |
|   | M | 48 | 23.08 | 0.77 1b   | 0.88 | 0.9  |
|   | M | 58 | 22.58 | 6.23 3    | 1.03 | 1.47 |
|   | M | 61 | 23.71 | 1.33 1b   | 0.89 | 0.37 |
|   | M | 50 | 24.34 | 1 2       | 0.96 | 0.6  |
|   | M | 53 | 30.49 | 1.02 2    | 0.93 | 0.68 |
|   | M | 58 | 19.4  | 1.01 1b+3 | 0.96 | 1.27 |
|   | M | 31 | 22.18 | 0.92 6    | 0.82 | 0.34 |

| ALB | ASCITES | HEP | Hb | SVR    | Skin Itching at W4 | Skin itchin | Skin itching at W12 |
|-----|---------|-----|----|--------|--------------------|-------------|---------------------|
| 3.9 | 1       |     |    | 12.7 2 | 0                  | 0           | 0                   |
| 3.9 | 1       |     |    | 15.2 3 | 1                  | 0           | 0                   |
| 4.3 | 1       |     |    | 14.2 3 | 0                  | 0           | 0                   |
| 4.4 | 1       |     |    | 13.5 3 | 0                  | 0           | 0                   |
| 3.6 |         |     |    | 9.3    | 0                  | 1           | 0                   |
| 3.9 | 1       |     |    | 13.9 3 | 0                  | 0           | 0                   |
| 4.1 | 1       |     |    | 14.1   | 0                  | 0           | 0                   |
| 2.4 | 1       |     |    | 11.1   | 0                  | 0           | 0                   |
| 4   | 1       |     |    | 13.7 3 | 0                  | 1           | 0                   |
| 4.1 | 1       |     |    | 14.4 3 | 1                  | 0           | 0                   |
| 3.3 | 1       |     |    | 10.3 3 | 1                  | 1           | 1                   |
| 4   | 1       | 1   |    | 10.4   | 0                  | 0           | 0                   |
| 4.3 | 1       | 1   |    | 13.3 3 | 0                  | 0           | 0                   |
| 4.7 | 1       |     |    | 11.9 3 | 0                  | 0           | 0                   |
| 3.8 | 1       |     |    | 13.4 3 | 0                  | 0           | 0                   |
| 4.7 | 1       |     |    | 14.8   | 0                  | 0           | 0                   |
| 3.6 | 1       | 1   |    | 13.2 3 | 0                  | 0           | 0                   |
| 4.1 | 1       |     |    | 16 3   | 0                  | 0           | 0                   |
| 3.1 | 1       | 1   |    | 8.8 3  | 0                  | 0           | 0                   |
| 4.4 | 1       |     |    | 15.1 3 | 0                  | 0           | 0                   |
| 3.9 | 1       | 1   |    | 14.3 3 | 0                  | 0           | 0                   |
| 4.2 | 1       | 1   |    | 11.1 3 | 0                  | 0           | 0                   |
| 3.5 |         |     |    | 8.5 3  | 1                  | 0           | 0                   |
| 3.8 | 1       |     |    | 14.3 3 | 1                  | 0           | 0                   |
| 4   | 1       | 1   |    | 13.6 3 | 1                  | 1           | 0                   |
| 4.2 | 1       | 1   |    | 14 3   | 0                  | 0           | 0                   |
| 4   | 1       | 1   |    | 15.3 3 | 1                  | 0           | 0                   |
| 2.6 | 1       | 1   |    | 9.9 3  | 1                  | 0           | 0                   |
| 4.7 | 1       |     |    | 14.3 3 | 0                  | 0           | 0                   |
| 3.8 | 1       |     |    | 11.5 3 | 0                  | 0           | 0                   |
| 4.3 | 1       | 1   |    | 13.1 3 | 1                  | 0           | 0                   |
| 3.6 | 1       | 1   |    | 14.7 3 | 0                  | 0           | 0                   |
| 4.4 | 1       |     |    | 15.3   | 1                  | 0           | 0                   |
| 4   | 1       |     |    | 13.4   | 0                  | 0           | 0                   |
| 4.4 | 1       |     |    | 13.8   | 0                  | 0           | 0                   |
| 4.1 | 1       |     |    | 13.8 3 | 0                  | 0           | 0                   |
| 4   | 1       |     |    | 12.1 3 | 0                  | 0           | 0                   |
| 4.3 | 1       |     |    | 9      | 0                  | 0           | 0                   |
| 2.8 | 1       | 1   |    | 9.1 3  | 1                  | 1           | 0                   |
| 3.7 | 1       |     |    | 7.8 3  | 0                  | 0           | 1                   |
| 2.7 | 1       |     |    | 7.8 3  | 0                  | 0           | 0                   |
| 2.8 | 1       |     |    | 13.8   | 1                  | 1           | 0                   |
| 4.3 | 1       |     |    | 15 3   | 0                  | 0           | 0                   |
| 4.7 | 1       |     |    | 14.5 3 | 0                  | 0           | 0                   |
| 3.6 | 1       |     |    | 12.7 3 | 0                  | 0           | 0                   |
| 4   | 1       | 1   |    | 10.5 3 | 0                  | 0           | 0                   |
| 3.5 | 1       |     |    | 11.2   | 0                  | 0           | 0                   |
| 4.6 | 1       | 1   |    | 14.7   | 0                  | 0           | 0                   |
| 2.8 | 1       | 1   |    | 11.6   | 1                  | 1           | 1                   |

|     |   |   |        |   |   |   |
|-----|---|---|--------|---|---|---|
| 3.5 | 1 |   | 10.8 3 | 1 | 1 | 0 |
| 4.4 | 1 |   | 14.3 3 | 1 | 0 | 0 |
| 4.6 | 1 |   | 13.4 3 | 0 | 0 | 0 |
| 4.1 | 1 | 1 | 14.4 3 | 0 | 0 | 0 |
| 3.8 | 1 | 1 | 9.6 3  | 1 | 1 | 1 |
| 4.3 | 1 | 1 | 10.1   | 0 | 0 | 0 |
| 4.2 | 1 | 1 | 13.7   | 0 | 0 | 0 |
| 3.9 |   |   | 16.1 3 | 0 | 0 | 0 |
| 2.9 | 1 |   | 10.1   | 0 | 0 | 0 |
| 3.7 | 1 | 1 | 16.6   | 0 | 0 | 0 |
| 3.6 | 1 |   | 13.4 3 | 1 | 0 | 0 |
| 3.5 | 1 |   | 12.6 3 | 1 | 0 | 0 |
| 4   | 1 | 1 | 14.1 3 | 0 | 0 | 0 |
| 3.1 | 2 | 1 | 9.4 3  | 0 | 1 | 0 |
| 4   | 1 | 1 | 13.4 3 | 0 | 0 | 0 |
| 4.4 | 1 |   | 15.7 3 | 0 | 0 | 0 |
| 4.2 | 1 | 1 | 16.4 3 | 0 | 0 | 0 |
| 3.3 | 1 | 1 | 11.3   | 0 | 0 | 0 |
| 4.1 | 1 | 1 | 12.9 3 | 0 | 0 | 0 |
| 3.7 | 1 | 1 | 13.8 3 | 0 | 0 | 0 |
| 4.2 | 1 | 1 | 15.1 3 | 0 | 0 | 0 |
| 3.6 | 1 |   | 14.7 3 | 1 | 0 | 0 |
| 3.4 | 1 | 1 | 12.5   | 0 | 0 | 0 |
| 3.1 | 1 |   | 10.5 3 | 0 | 0 | 0 |
| 4.1 | 1 | 1 | 17.5 3 | 0 | 0 | 0 |
| 3.1 | 1 |   | 11.2   | 0 | 0 | 0 |
| 4.1 | 1 |   | 13.4 3 | 0 | 0 | 0 |
| 3.5 | 1 |   | 10.8 3 | 0 | 0 | 0 |
| 3.9 | 1 |   | 13.6   | 0 | 0 | 0 |
| 4.5 | 1 |   | 13.9 3 | 0 | 0 | 0 |
| 4.4 | 1 | 1 | 13.2 3 | 0 | 0 | 0 |
| 4.2 | 1 |   | 12.6   | 0 | 0 | 0 |
| 4.6 | 1 | 1 | 15.3 3 | 0 | 0 | 0 |
| 3.9 | 1 |   | 12.7 3 | 0 | 0 | 0 |
| 4.2 | 1 |   | 11.1 3 | 1 | 0 | 0 |
| 4.3 | 1 |   | 17.2 3 | 1 | 0 | 0 |
| 3.4 | 1 |   | 13.2 3 | 1 | 0 | 0 |
| 4.3 | 1 | 1 | 13.8   | 0 | 0 | 0 |
| 3.9 | 1 |   | 12.6 3 | 1 | 1 | 0 |
| 3.7 | 1 |   | 17.1 3 | 0 | 0 | 0 |
| 4   | 1 |   | 13.4 3 | 1 | 0 | 0 |
| 3.8 | 1 | 1 | 14.5 3 | 0 | 0 | 0 |
| 4   | 1 |   | 12 3   | 0 | 0 | 0 |
| 4.2 | 1 |   | 15     | 1 | 0 | 0 |
| 4.2 | 1 | 1 | 13.7   | 0 | 0 | 0 |
| 3.2 | 1 | 1 | 9.1 3  | 1 | 1 | 0 |
| 4.2 | 1 | 1 | 13 3   | 0 | 0 | 0 |
| 3.9 | 1 | 1 | 15.4 3 | 0 | 0 | 0 |
| 2.4 | 1 | 1 | 7 3    | 1 | 0 | 0 |
| 3.6 | 1 |   | 14.3 3 | 0 | 0 | 0 |

|     |   |   |        |   |   |   |
|-----|---|---|--------|---|---|---|
| 4.1 | 1 |   | 14.7 3 | 0 | 0 | 0 |
| 3.1 | 1 | 1 | 15.2 3 | 1 | 0 | 0 |
| 3.5 | 1 | 1 | 12.8 3 | 1 | 1 | 0 |
| 4.3 | 1 | 1 | 13.4 3 | 0 | 0 | 0 |
| 3.6 | 1 |   | 15 3   | 1 | 0 | 0 |
| 4.3 | 1 |   | 12.2 3 | 1 | 0 | 0 |
| 2.9 | 1 |   | 10.5 3 | 0 | 0 | 0 |
| 3.9 | 1 |   | 11.2 3 | 0 | 0 | 0 |
| 3.8 | 1 | 1 | 9.2    | 1 | 1 | 1 |
| 4.1 | 1 |   | 13.4 3 | 0 | 0 | 0 |
| 4.6 | 1 |   | 15.9 3 | 0 | 0 | 0 |
| 4.7 | 1 |   | 14.5 3 | 1 | 0 | 0 |
| 4.2 | 1 | 1 | 13.2   | 0 | 0 | 0 |
| 3.1 | 1 | 1 | 10.6 3 | 0 | 0 | 0 |
| 4.6 | 1 |   | 15.7 3 | 0 | 0 | 0 |
| 4.4 | 1 | 1 | 10.6 3 | 1 | 0 | 0 |
| 3.4 | 1 |   | 12.4 3 | 0 | 0 | 0 |
| 3.9 | 1 |   | 16.8 3 | 0 | 0 | 0 |
| 4.3 | 1 | 1 | 15.3 1 | 0 | 0 | 0 |
| 3.9 | 1 |   | 12.6 3 | 1 | 0 | 0 |
| 4.3 | 1 |   | 14.6 3 | 1 | 0 | 0 |
| 3.8 | 1 |   | 14 3   | 0 | 0 | 0 |
| 4.4 | 1 |   | 15.4 3 | 0 | 0 | 0 |
| 3.5 | 1 |   | 12.1 3 | 1 | 0 | 0 |
| 4.7 | 1 |   | 15.5 3 | 1 | 0 | 0 |
| 3.6 | 1 | 1 | 11     | 0 | 0 | 0 |
| 4   | 1 | 1 | 13.8 3 | 0 | 0 | 0 |
| 4.4 | 1 |   | 14.3 3 | 0 | 1 | 1 |
| 4.1 | 1 | 1 | 11 3   | 0 | 0 | 0 |
| 3.8 | 1 | 1 | 13.5 3 | 0 | 0 | 0 |
| 4.2 | 1 |   | 8.9 3  | 0 | 0 | 0 |
| 3.9 | 1 |   | 13.9 3 | 0 | 0 | 0 |
| 4.3 | 1 | 1 | 13.7 3 | 0 | 0 | 0 |
| 4.1 | 1 |   | 16.3 3 | 0 | 0 | 0 |
| 3.9 | 1 |   | 13.5   | 1 | 0 | 0 |
| 3.9 | 1 |   | 10.8 3 | 1 | 0 | 0 |
| 3.2 | 1 |   | 11.3 3 | 1 | 0 | 0 |
| 3.4 | 1 |   | 9.8 3  | 0 | 0 | 0 |
| 4.1 | 1 |   | 15.5 1 | 0 | 0 | 0 |
| 3.5 | 1 | 1 | 8.6 3  | 1 | 0 | 0 |
| 4.5 | 1 | 1 | 15 3   | 1 | 0 | 0 |
| 4.5 | 1 | 1 | 16.1 3 | 0 | 0 | 0 |
| 4.2 | 1 | 1 | 15 3   | 0 | 0 | 0 |
| 3.7 | 1 |   | 13.9 3 | 0 | 0 | 0 |
| 4   | 1 |   | 13.5 3 | 0 | 0 | 0 |
| 3.9 | 1 |   | 12.8 3 | 0 | 0 | 0 |
| 3.2 | 1 | 1 | 10.3 3 | 0 | 0 | 0 |
| 3.2 | 1 |   | 9.8 3  | 0 | 0 | 0 |
| 4.2 | 1 |   | 13.7 3 | 0 | 0 | 0 |
| 3.4 | 1 |   | 6.7 3  | 0 | 0 | 0 |

|     |   |   |        |   |   |   |
|-----|---|---|--------|---|---|---|
| 3.8 | 1 |   | 12.6 3 | 0 | 0 | 0 |
| 4.2 | 1 | 1 | 13.6 3 | 0 | 0 | 0 |
| 4.5 | 1 |   | 14.6 3 | 0 | 0 | 0 |
| 4.3 | 1 | 1 | 13.1   | 0 | 0 | 0 |
| 4.3 | 1 |   | 11.1 3 | 1 | 0 | 0 |
| 2.8 | 1 |   | 12.4 3 | 1 | 0 | 0 |
| 4.3 | 1 | 1 | 15.4 3 | 1 | 1 | 0 |
| 3.8 | 1 | 1 | 12.7   | 1 | 0 | 0 |
| 4.4 | 1 |   | 14.3 3 | 0 | 0 | 0 |
| 3.8 | 1 | 1 | 15.2   | 0 | 0 | 0 |
| 4   | 1 | 1 | 11.9 3 | 0 | 0 | 0 |
| 4.2 | 1 |   | 14.5   | 0 | 0 | 0 |
| 3.3 | 1 |   | 8.3 3  | 0 | 0 | 0 |
| 4.3 | 1 |   | 15     | 0 | 0 | 0 |
| 4.3 | 1 |   | 15.4 3 | 0 | 1 | 0 |
| 4.3 | 1 |   | 13.9 3 | 0 | 0 | 0 |
| 3.1 | 3 |   | 11 3   | 0 | 0 | 0 |
| 4.3 | 1 | 1 | 15.1   | 0 | 0 | 0 |
| 3.7 | 1 |   | 11.8 3 | 0 | 0 | 0 |
| 3.7 | 1 | 1 | 11.2   | 1 | 0 | 0 |
| 4   | 1 |   | 11.3 3 | 0 | 0 | 0 |
| 3.3 | 1 | 1 | 10.5 3 | 0 | 0 | 0 |
| 4.2 | 1 |   | 14.8 3 | 0 | 0 | 0 |
| 3.9 | 1 |   | 14.3 3 | 0 | 0 | 0 |
| 3.8 | 1 | 1 | 11.4 3 | 0 | 0 | 0 |
| 4.3 | 1 |   | 10     | 0 | 1 | 0 |
| 4.2 | 1 | 1 | 16.5 3 | 0 | 0 | 0 |
| 4.3 | 1 | 1 | 15.7 3 | 0 | 0 | 0 |
| 4.5 | 1 |   | 13.4 3 | 0 | 0 | 0 |
| 4.4 | 1 |   | 12.8   | 1 | 0 | 0 |
| 4   | 1 |   | 13     | 0 | 0 | 0 |
| 3.7 | 1 |   | 14.3 3 | 0 | 0 | 0 |
| 3.8 | 1 |   | 10 3   | 0 | 0 | 0 |
| 4.2 | 1 | 1 | 14.3 3 | 0 | 0 | 0 |
| 4.2 | 1 |   | 15.3   | 0 | 0 | 0 |
| 3.5 | 1 |   | 12.9 3 | 1 | 0 | 0 |
| 4.3 | 1 | 1 | 15 3   | 1 | 0 | 0 |
| 4.5 | 1 |   | 16.9 3 | 0 | 0 | 0 |
| 4.7 | 1 | 1 | 14.3 3 | 0 | 0 | 0 |
| 3   | 1 | 1 | 13.4   | 0 | 1 | 0 |
| 4   | 1 |   | 15.6   | 1 | 0 | 0 |
| 4.1 | 1 |   | 13.3 3 | 1 | 0 | 0 |
| 3.9 | 1 |   | 10.4 3 | 1 | 0 | 0 |
| 4.5 | 1 |   | 15.5 3 | 0 | 0 | 0 |
| 4.3 | 1 |   | 9.3    | 1 | 0 | 0 |
| 3.7 | 2 |   | 8.4 3  | 1 | 0 | 0 |
| 4.3 | 1 |   | 13.6 3 | 1 | 0 | 0 |
| 3.7 | 1 |   | 8.6 3  | 1 | 0 | 0 |
| 4.3 | 1 | 1 | 14.5   | 0 | 0 | 0 |
| 3.7 | 1 | 1 | 14.6 3 | 0 | 0 | 0 |

|     |   |   |        |   |   |   |
|-----|---|---|--------|---|---|---|
| 3.5 | 1 | 1 | 11.5   | 1 | 0 | 0 |
| 4.1 | 1 | 1 | 16.8 3 | 1 | 0 | 0 |
| 3.8 | 1 |   | 15.3 3 | 1 | 0 | 0 |
| 4.3 | 1 | 1 | 12.4 3 | 0 | 0 | 0 |
| 4.1 | 1 |   | 13.1 3 | 0 | 0 | 0 |
| 4.3 | 1 |   | 13.8   | 0 | 0 | 0 |
| 3.5 | 1 |   | 10.2 3 | 1 | 0 | 0 |
| 3.9 | 1 |   | 14 3   | 1 | 0 | 0 |
| 4.4 | 1 | 1 | 14.1 3 | 0 | 0 | 0 |
| 3.4 | 1 |   | 12.6 3 | 0 | 0 | 0 |
| 3.9 | 1 |   | 12.1 3 | 0 | 0 | 0 |
| 4   | 1 |   | 11.9 3 | 1 | 1 | 0 |
| 4.4 | 1 | 1 | 15.5 3 | 0 | 0 | 0 |
| 4.3 | 1 | 1 | 16.2 3 | 0 | 0 | 0 |
| 2   | 1 |   | 8.1 3  | 1 | 0 | 0 |
| 4.3 | 1 |   | 14.3 3 | 0 | 0 | 0 |
| 3.9 | 1 |   | 14.1 3 | 0 | 0 | 0 |
| 3.9 | 1 | 1 | 13 3   | 1 | 0 | 0 |
| 3.9 | 1 |   | 14.8 3 | 0 | 0 | 0 |
| 3.8 | 1 |   | 13.1 3 | 0 | 0 | 0 |
| 3.7 | 1 | 1 | 8.7 3  | 0 | 0 | 0 |
| 4.3 | 1 |   | 14.2 3 | 0 | 0 | 0 |
| 3.6 | 1 |   | 7.5 0  | 0 | 0 | 0 |
| 4.5 | 1 |   | 14.7   | 0 | 0 | 0 |
| 4   | 1 |   | 14.6   | 0 | 0 | 0 |
| 4.1 | 1 |   | 13.4 3 | 0 | 0 | 0 |
| 4   | 1 | 1 | 12.7 3 | 0 | 0 | 0 |
| 4.4 | 1 |   | 16.4 3 | 0 | 0 | 0 |
| 4.2 | 1 | 1 | 15 3   | 0 | 0 | 0 |
| 4.1 | 1 | 1 | 16.3 3 | 0 | 1 | 0 |
| 3.5 | 1 | 1 | 9.9 3  | 0 | 0 | 0 |
| 3.3 | 1 |   | 14     | 0 | 1 | 0 |
| 4   | 1 | 1 | 14.3   | 0 | 0 | 0 |
| 4.3 | 1 |   | 13.3   | 0 | 0 | 0 |
| 3.9 | 1 |   | 16.4   | 0 | 0 | 0 |
| 3.6 | 1 |   | 15.5   | 0 | 0 | 0 |

| H/D | CAPD | H/D or CAPD |
|-----|------|-------------|
| 0   | 0    | 0           |
| 0   | 0    | 0           |
| 0   | 0    | 0           |
| 0   | 0    | 0           |
| 0   | 0    | 0           |
| 0   | 0    | 0           |
| 0   | 0    | 0           |
| 0   | 0    | 0           |
| 1   | 0    | 1           |
| 0   | 0    | 0           |
| 0   | 1    | 1           |
| 0   | 0    | 0           |
| 0   | 0    | 0           |
| 0   | 0    | 0           |
| 0   | 0    | 0           |
| 0   | 0    | 0           |
| 0   | 0    | 0           |
| 0   | 0    | 0           |
| 0   | 0    | 0           |
| 0   | 0    | 0           |
| 1   | 0    | 1           |
| 0   | 0    | 0           |
| 0   | 0    | 0           |
| 0   | 0    | 0           |
| 0   | 0    | 0           |
| 1   | 0    | 1           |
| 0   | 0    | 0           |
| 1   | 0    | 1           |
| 0   | 0    | 0           |
| 0   | 0    | 0           |
| 0   | 0    | 0           |
| 0   | 0    | 0           |
| 0   | 0    | 0           |
| 0   | 0    | 0           |
| 1   | 0    | 1           |
| 0   | 0    | 0           |
| 1   | 0    | 1           |
| 1   | 0    | 1           |
| 0   | 0    | 0           |
| 0   | 0    | 0           |
| 0   | 0    | 0           |
| 0   | 0    | 0           |
| 0   | 0    | 0           |
| 0   | 0    | 0           |
| 1   | 0    | 1           |



|   |   |   |
|---|---|---|
| 1 | 0 | 1 |
| 0 | 0 | 0 |
| 0 | 0 | 0 |
| 0 | 0 | 0 |
| 0 | 0 | 0 |
| 0 | 0 | 0 |
| 0 | 0 | 0 |
| 0 | 0 | 0 |
| 1 | 0 | 1 |
| 0 | 0 | 0 |
| 1 | 0 | 1 |
| 1 | 0 | 1 |
| 0 | 0 | 0 |
| 0 | 1 | 1 |
| 0 | 0 | 0 |
| 0 | 0 | 0 |
| 0 | 0 | 0 |
| 1 | 0 | 1 |
| 0 | 0 | 0 |
| 0 | 0 | 0 |
| 0 | 0 | 0 |
| 0 | 0 | 0 |
| 0 | 0 | 0 |
| 0 | 0 | 0 |
| 0 | 0 | 0 |
| 0 | 0 | 0 |
| 0 | 0 | 0 |
| 0 | 0 | 0 |
| 0 | 0 | 0 |
| 0 | 0 | 0 |
| 0 | 0 | 0 |
| 0 | 0 | 0 |
| 0 | 0 | 0 |
| 0 | 0 | 0 |
| 0 | 0 | 0 |
| 0 | 0 | 0 |
| 0 | 0 | 0 |
| 0 | 0 | 0 |
| 1 | 0 | 1 |
| 0 | 0 | 0 |
| 1 | 0 | 1 |
| 0 | 0 | 0 |
| 0 | 0 | 0 |
| 0 | 0 | 0 |
| 0 | 0 | 0 |
| 0 | 0 | 0 |
| 0 | 0 | 0 |
| 0 | 0 | 0 |
| 0 | 0 | 0 |
| 0 | 0 | 0 |
| 1 | 0 | 1 |
| 0 | 0 | 0 |
| 0 | 0 | 0 |
| 0 | 1 | 1 |
| 0 | 0 | 0 |

|   |   |   |
|---|---|---|
| 0 | 0 | 0 |
| 1 | 0 | 1 |
| 1 | 0 | 1 |
| 0 | 0 | 0 |
| 1 | 0 | 1 |
| 0 | 0 | 0 |
| 1 | 0 | 1 |
| 0 | 0 | 0 |
| 1 | 0 | 1 |
| 0 | 0 | 0 |
| 0 | 0 | 0 |
| 0 | 0 | 0 |
| 1 | 0 | 1 |
| 0 | 0 | 0 |
| 0 | 0 | 0 |
| 0 | 0 | 0 |
| 0 | 0 | 0 |
| 0 | 0 | 0 |
| 0 | 0 | 0 |
| 0 | 0 | 0 |
| 0 | 0 | 0 |
| 0 | 0 | 0 |
| 0 | 0 | 0 |
| 0 | 0 | 0 |
| 0 | 0 | 0 |
| 0 | 0 | 0 |
| 0 | 0 | 0 |
| 0 | 0 | 0 |
| 0 | 0 | 0 |
| 1 | 0 | 1 |
| 0 | 0 | 0 |
| 0 | 0 | 0 |
| 0 | 0 | 0 |
| 0 | 0 | 0 |
| 1 | 0 | 1 |
| 1 | 0 | 1 |
| 0 | 0 | 0 |
| 1 | 0 | 1 |
| 0 | 0 | 0 |
| 0 | 0 | 0 |
| 0 | 0 | 0 |
| 0 | 0 | 0 |
| 0 | 0 | 0 |
| 0 | 0 | 0 |
| 0 | 0 | 0 |
| 1 | 0 | 1 |
| 1 | 0 | 1 |
| 0 | 0 | 0 |
| 0 | 0 | 0 |
